# Supplementary material
Source: HighWire-hosted journal article supplement (http://annfammed.org/highwire/filestream/8593/field_highwire_adjunct_files/0/Zhong-Supp-Apps.pdf)
Supplement: Zhong-Supp-Apps.pdf [file Zhong-Supp-Apps.pdf]

Supplementary materials for:

Zhong X, Wang Z, Fisher EB, Tanasugarn C. Peer Support for Diabetes Management in Primary Care and Community Settings in Anhui Province, China. *Ann Fam Med*. 2015;13:(Suppl 1)S50-S58. doi: 10.1370/afm.1799.

**Supplemental Appendix 1. Means (SD) of Participants on Study Variables in PLSP Intervention and Control Conditions at Baseline**

| Variable                                       | PLSP<br>(n = 365) | Control<br>(n = 361) | <i>p</i> Values for Comparisons |                           |                                             |
|------------------------------------------------|-------------------|----------------------|---------------------------------|---------------------------|---------------------------------------------|
|                                                |                   |                      | PLSP vs<br>Control              | Communities<br>1, 2 and 3 | Interaction:<br>Intervention<br>X Community |
| Age                                            | 63.00<br>(9.42)   | 63.52<br>(8.78)      | .431                            | .854                      | .007                                        |
| Education                                      | 1.86<br>(.92)     | 1.72<br>(.88)        | .029                            | .119                      | .056                                        |
| Income                                         | 2.11<br>(.81)     | 1.84<br>(.72)        | .000                            | .006                      | .000                                        |
| Knowledge                                      | 5.48<br>(2.67)    | 7.20<br>(2.60)       | .000                            | .000                      | .000                                        |
| Attitudes                                      | 29.79<br>(5.63)   | 29.24<br>(4.93)      | .076                            | .000                      | .009                                        |
| Self-efficacy                                  | 34.79<br>(4.73)   | 33.99<br>(5.45)      | .015                            | .000                      | .000                                        |
| Social support                                 | 30.57<br>(6.93)   | 29.01<br>(5.92)      | .001                            | .000                      | .157                                        |
| Diet                                           | 19.29<br>(2.29)   | 19.04<br>(2.14)      | .116                            | .000                      | .190                                        |
| Physical activity                              | 9.32<br>(3.37)    | 9.00<br>(2.53)       | .099                            | .000                      | .000                                        |
| Glucose monitoring                             | 4.02<br>(1.67)    | 4.58<br>(1.54)       | .000                            | .004                      | .000                                        |
| Medication adherence                           | 4.19<br>(1.60)    | 4.35<br>(1.56)       | .161                            | .078                      | .070                                        |
| BMI (kg/m <sup>2</sup> )                       | 24.13<br>(3.25)   | 24.09<br>(3.25)      | .945                            | .000                      | .103                                        |
| SBP                                            | 135.72<br>(14.29) | 133.61<br>(15.29)    | .055                            | .001                      | .000                                        |
| DBP                                            | 83.19<br>(8.83)   | 80.92<br>(9.56)      | .001                            | .000                      | .000                                        |
| Fasting glucose (mmol/L)                       | 8.07<br>(3.76)    | 6.70<br>(1.72)       | .000                            | .000                      | .261                                        |
| Fasting glucose (mg/dl) <sup>a</sup>           | 145.41            | 120.72               |                                 |                           |                                             |
| 2-Hour post-prand glucose (mmol/L)             | 11.75<br>(3.98)   | 10.48<br>(2.32)      | .000                            | .002                      | .007                                        |
| 2-Hour post-prand glucose (mg/dl) <sup>a</sup> | 211.71            | 188.83               |                                 |                           |                                             |

**Education:** 1 = primary school, 2 = completed junior high school, 3 = completed high school/vocational/technical secondary school, 4 = completed junior college, bachelor degree or above

**Income:** during previous year, average monthly income of your family: 1 = under ¥ 999, 2 = ¥ 1000 - ¥ 1999, 3 = ¥ 2000-¥ 4999, 4 = more than ¥ 5000, 5 = “don’t know” recoded as sample mean.

**Description of Self-Report Measures**

**Knowledge:** Total of 12 items, 4 – glucose; 3 – diabetic complications; 2 – diet; and 3 –insulin. Correct responses received one point and incorrect answers or “don’t know/unsure” received zero. Possible range of knowledge scores was 0 to 12. High scores indicate greater knowledge.

**Attitudes toward self-management** 9 items scored 1 to 5 (‘Strongly disagree,’ ... ‘Strongly Agree’) with range of 9-45. High scores indicate more positive attitudes.

**Self efficacy for self management** 9 items scored 1 to 5 (‘Strongly disagree,’ ... ‘Strongly Agree’) with range of 9-45. High scores indicate greater self efficacy.

**Perceived social support for self management** 9 items scored 1 to 5 (‘Never,’ ... ‘Always’) with range of 9-45. High scores indicate greater perceived support.

**Self-management:** 9 items, scored 1 to 5 resulting in subscores for: diet – 4 items, maximum score = 20, physical activity – 2 items, maximum score = 10, glucose monitoring – 2 items, maximum = 10, medication adherence – 1 item, maximum = 5.<sup>30</sup> High scores indicate greater self management practices.

<sup>a</sup>Glucose levels in mg/dl are conversions from means expressed as mmol/L

*P* Values are for comparisons within GLM analyses of variables by intervention (PLSP vs control), community (communities 1 through 3), and the interaction of intervention by communities. scales are defined at bottom of table.

**Supplemental Appendix 2. Means (SD) of Participants on Baseline Study Variables Comparing those Completing and Not Completing Follow-Up**

| Variable                 | PLSP                     |                      | Control                  |                     | All                      |                      | p Levels                                        |                                             |                                         |
|--------------------------|--------------------------|----------------------|--------------------------|---------------------|--------------------------|----------------------|-------------------------------------------------|---------------------------------------------|-----------------------------------------|
|                          | Not Completing (n = 108) | Completing (n = 135) | Not Completing (n = 149) | Completing (n = 94) | Not Completing (n = 257) | Completing (n = 229) | Completion Status: Completing vs Not Completing | Interaction: Completion Status by Condition | PLSP Only: Completing vs Not Completing |
| Age                      | 62.81<br>(9.70)          | 64.30<br>(8.46)      | 62.85<br>(9.05)          | 63.62<br>(9.20)     | 62.84<br>(9.31)          | 64.02<br>(8.76)      | .179                                            | .665                                        | .203                                    |
| Education                | 1.71<br>(.89)            | 1.96<br>(1.01)       | 1.68<br>(.91)            | 1.72<br>(.84)       | 1.69<br>(.90)            | 1.86<br>(.95)        | .082                                            | .229                                        | .044                                    |
| Income                   | 1.96<br>(.74)            | 2.12<br>(.87)        | 1.95<br>(.80)            | 1.84<br>(.75)       | 1.95<br>(.77)            | 2.00<br>(.84)        | .738                                            | .077                                        | .142                                    |
| Knowledge                | 5.30<br>(2.58)           | 6.36<br>(2.62)       | 8.06<br>(2.27)           | 7.88<br>(2.04)      | 6.90<br>(2.76)           | 6.98<br>(2.51)       | .047                                            | .005                                        | .001                                    |
| Attitudes                | 29.14<br>(4.26)          | 31.10<br>(6.15)      | 30.29<br>(3.68)          | 30.33<br>(6.71)     | 29.81<br>(3.96)          | 30.78<br>(6.38)      | .039                                            | .048                                        | .005                                    |
| Self-efficacy            | 34.47<br>(5.11)          | 34.74<br>(4.51)      | 35.30<br>(5.89)          | 34.79<br>(4.52)     | 34.95<br>(5.58)          | 34.76<br>(4.50)      | .799                                            | .410                                        | .632                                    |
| Social support           | 31.50<br>(7.70)          | 31.25<br>(7.15)      | 29.98<br>(4.53)          | 30.76<br>(7.59)     | 30.62<br>(6.10)          | 31.05<br>(7.32)      | .669                                            | .407                                        | .870                                    |
| Diet                     | 18.72<br>(2.09)          | 18.96<br>(1.96)      | 18.79<br>(1.68)          | 18.79<br>(2.17)     | 18.76<br>(1.86)          | 18.89<br>(2.05)      | .504                                            | .488                                        | .402                                    |
| Physical activity        | 9.37<br>(3.69)           | 10.13<br>(2.84)      | 9.21<br>(2.98)           | 9.21<br>(2.14)      | 9.28<br>(3.29)           | 9.75<br>(2.61)       | .171                                            | .170                                        | .081                                    |
| Glucose monitoring       | 3.99<br>(1.64)           | 4.06<br>(1.67)       | 5.23<br>(1.40)           | 4.01<br>(1.56)      | 4.71<br>(1.62)           | 4.04<br>(1.62)       | .000                                            | .000                                        | .749                                    |
| Medication adherence     | 4.36<br>(1.54)           | 3.98<br>(1.66)       | 4.46<br>(1.45)           | 3.83<br>(1.93)      | 4.42<br>(1.49)           | 3.92<br>(1.77)       | .001                                            | .396                                        | .107                                    |
| BMI (kg/m <sup>2</sup> ) | 22.76<br>(3.28)          | 24.03<br>(2.95)      | 24.01<br>(3.47)          | 23.32<br>(2.92)     | 23.49<br>(3.45)          | 23.74<br>(2.95)      | .328                                            | .001                                        | .000                                    |
| SBP                      | 134.76<br>(14.89)        | 135.95<br>(14.88)    | 132.55<br>(16.69)        | 130.44<br>(11.80)   | 133.48<br>(15.96)        | 133.69<br>(13.94)    | .739                                            | .232                                        | .906                                    |
| DBP                      | 81.81<br>(9.61)          | 82.39<br>(8.67)      | 80.56<br>(10.50)         | 79.04<br>(8.67)     | 81.09<br>(10.13)         | 81.02<br>(8.81)      | .589                                            | .230                                        | .368                                    |
| Fasting glucose (mmol/L) | 7.49<br>(2.57)           | 7.66<br>(2.12)       | 6.46<br>(1.64)           | 6.31<br>(1.61)      | 6.87<br>(2.12)           | 7.11<br>(2.04)       | .943                                            | .376                                        | .470                                    |

|                                                                                                                                                                                                                                                                                                                                                                                             |                 |                 |                 |                 |                 |                 |      |      |      |
|---------------------------------------------------------------------------------------------------------------------------------------------------------------------------------------------------------------------------------------------------------------------------------------------------------------------------------------------------------------------------------------------|-----------------|-----------------|-----------------|-----------------|-----------------|-----------------|------|------|------|
| Fastin<br>g<br>glucos<br>e<br>(mg/dl<br>) <sup>a</sup>                                                                                                                                                                                                                                                                                                                                      | 134.96          | 138.02          | 116.40          | 113.69          | 123.79          | 128.11          |      |      |      |
| 2-<br>Hour<br>post-<br>prand<br>glucos<br>e<br>(mmol<br>/L)                                                                                                                                                                                                                                                                                                                                 | 11.37<br>(4.31) | 11.56<br>(3.77) | 10.62<br>(2.64) | 10.37<br>(2.05) | 10.83<br>(3.21) | 11.07<br>(3.23) | .932 | .499 | .755 |
| 2-<br>Hour<br>post-<br>prand<br>glucos<br>e<br>(mg/dl<br>) <sup>a</sup>                                                                                                                                                                                                                                                                                                                     | 204.87          | 208.29          | 191.35          | 186.85          | 195.14          | 199.46          |      |      |      |
| <p><i>P</i> Values are for Comparisons within glm analyses of variables by completion status (completing, not completing), the interaction of completion status and condition (PLSP, control) and, within the PLSP condition, completion status. Scales are defined in Supplemental Table 1.</p> <p><sup>a</sup>Glucose levels in mg/dl are conversions from means expressed as mmol/L.</p> |                 |                 |                 |                 |                 |                 |      |      |      |
